# Supplementary material for: Ag–SnO2 nano-heterojunction–reduced graphene oxide by a stepwise photocatalyzed approach and its application in ractopamine determination
Source: Royal Society of Chemistry journal article supplement (doi:10.1039/c7ra10504e), 2017-01-01
Supplement: c7ra10504e1.pdf [file c7ra10504e1.pdf]

## Ag-SnO<sub>2</sub> Nano-Heterojunction/ Reduced Graphene Oxide by A Stepwise Photocatalyzed Approach and Its Application in Ractopamine Determination

Wenqiang Xie<sup>a, b</sup>, Lele Tang<sup>a, b</sup>, Meihui Ying<sup>a, b</sup>, Junshao Liu<sup>a, c</sup>, Haibo Pan<sup>\*a, b, c</sup>, and Min Du<sup>a, c</sup>.

<sup>a</sup> Fujian Key Lab of Medical Instrument & Pharmaceutical Technology, Qishan Campus, Fuzhou University, Fuzhou, Fujian 350116, P. R. China.

<sup>b</sup> College of Chemistry, Fuzhou University, Fuzhou, Fujian 350116, P. R. China

<sup>c</sup> Fujian Key Lab of Eco-Industrial Green Technology (Wuyi University), Wuyishan, Fujian 354300, P. R. China

\*Corresponding author. Tel: +86-591-22866127; fax: +86-591-22866127.

E-mail address: hbpan@fzu.edu.cn (H. Pan)

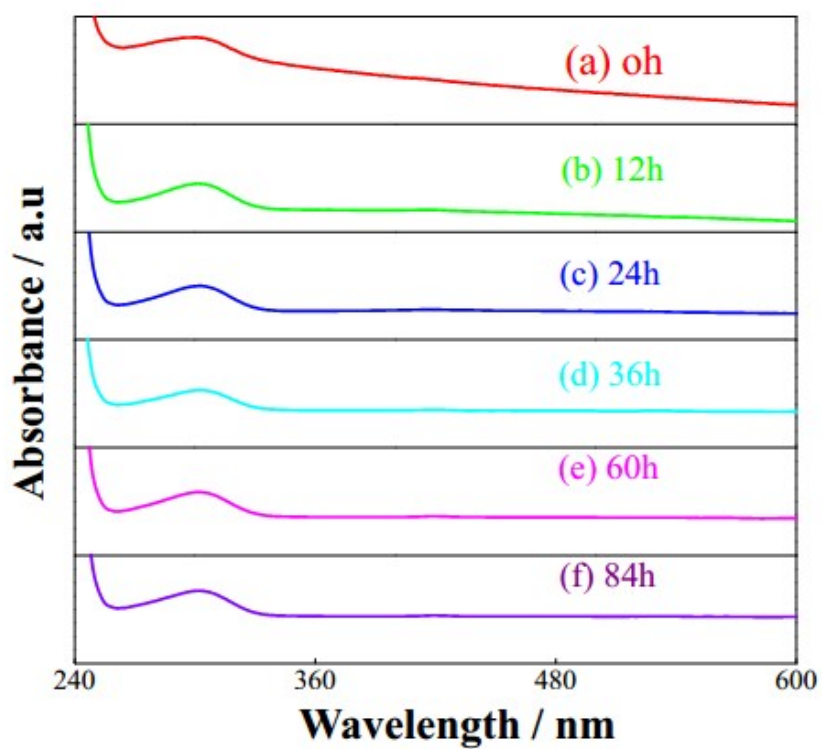

Fig. S1 UV-vis absorption spectra of SnO<sub>2</sub>-AgNPs suspension after standing for 0, 12, 24, 36, 60 and 84h, respectively.

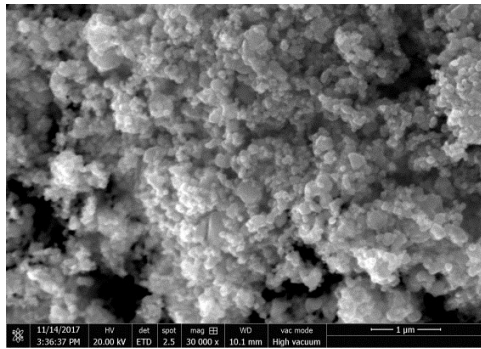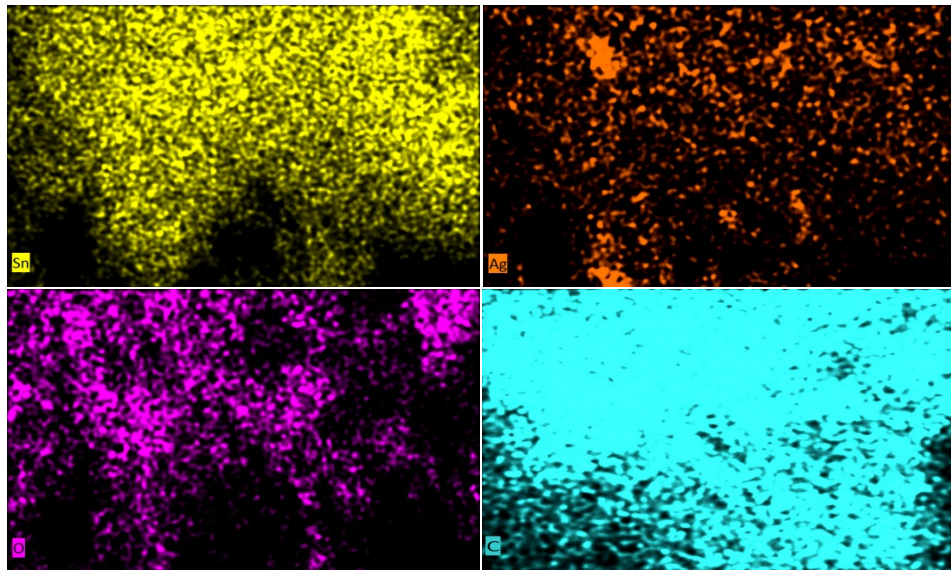

Fig. S2 SEM image and corresponding EDS mapping of SnO<sub>2</sub>-AgNPs /RGO composites.

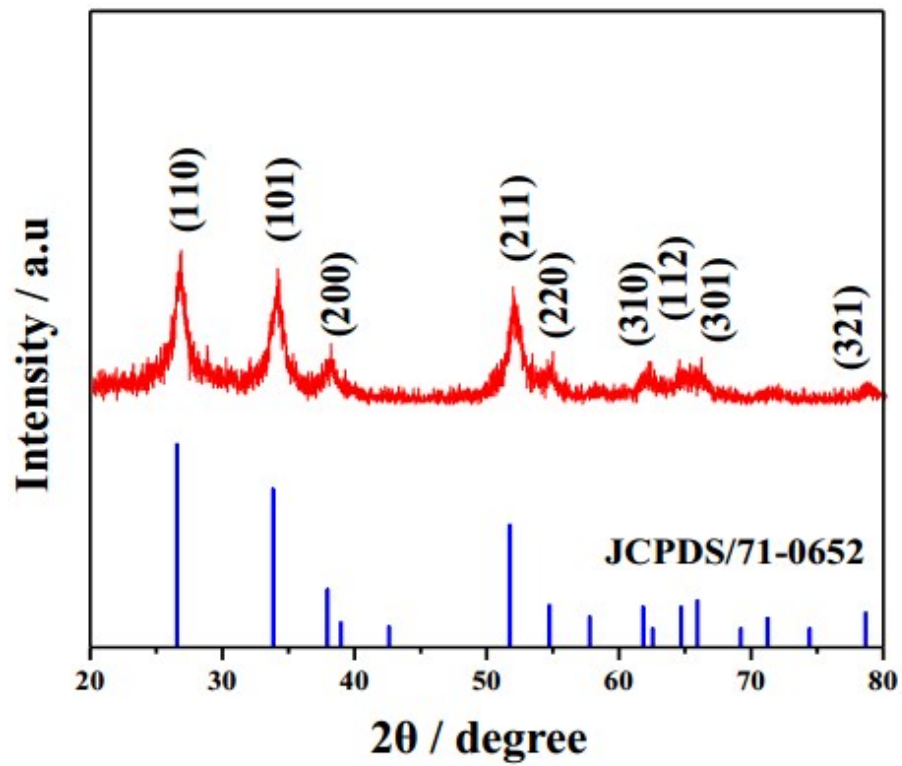

Fig. S3 XRD pattern of SnO<sub>2</sub>.

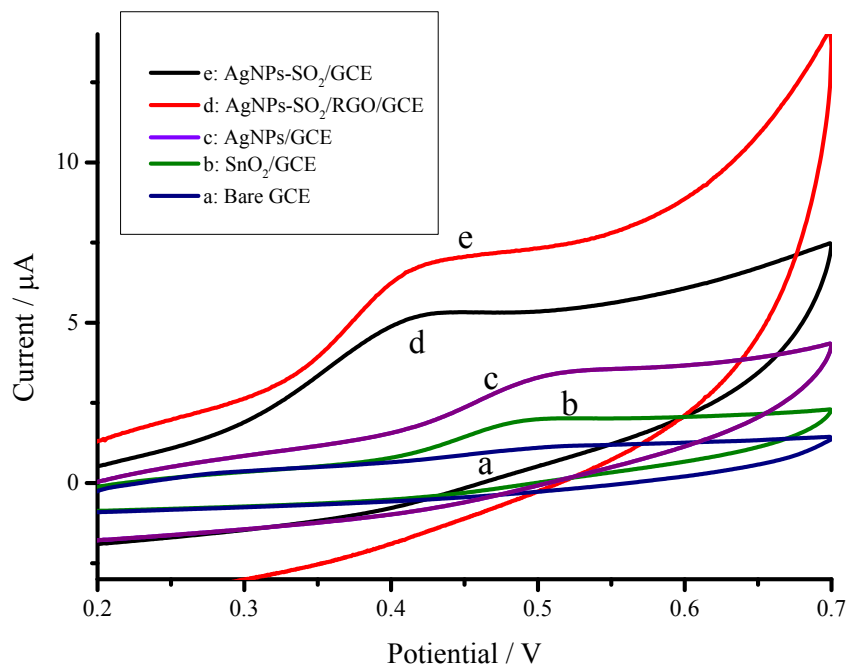

Fig. S4 CV of bare GCE(a), SnO<sub>2</sub>/GCE(b), AgNPs/GCE (c), SnO<sub>2</sub>-AgNPs/GCE (d) and SnO<sub>2</sub> AgNPs/RGO/GCE (e) containing RAC ( $5 \times 10^{-6}$  M) in PBS (0.1 M, pH 7.2).

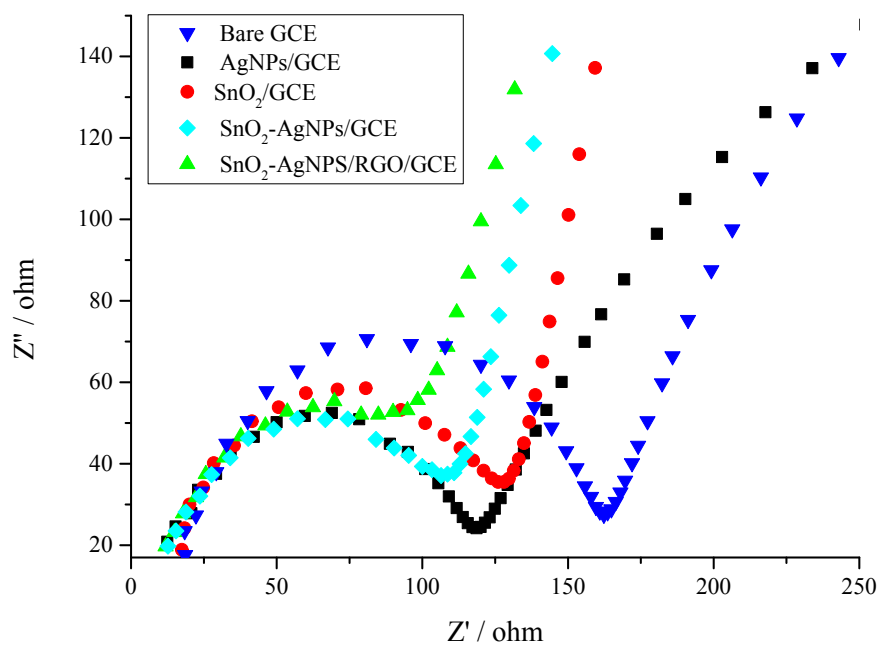

Fig. S5 Nyquist plot of bare GCE, SnO<sub>2</sub>/GCE, AgNPs/GCE, SnO<sub>2</sub>-AgNPs/GCE and SnO<sub>2</sub>-AgNPs/RGO/GCE in 5.0mM [Fe(CN)<sub>6</sub>]<sup>3-/4-</sup>.

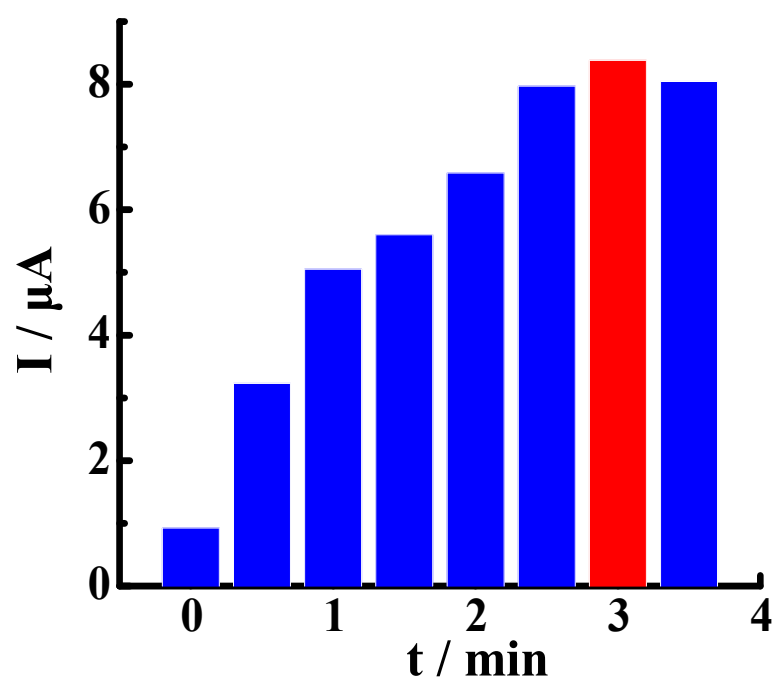

Figure. S6 Peak currents of  $5.0 \times 10^{-6}$  M RAC in PBS with accumulation time from 0 to 4 min.

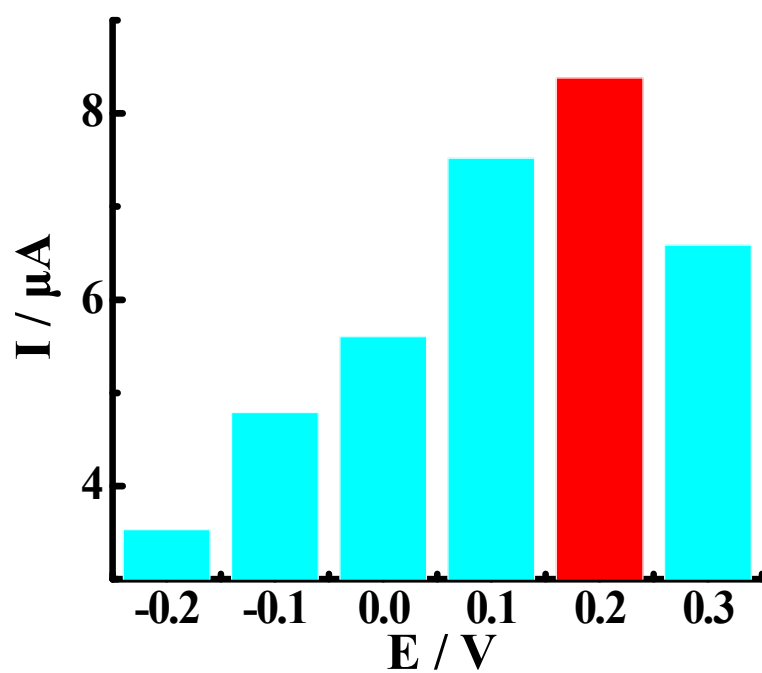

Figure. S7 Peak currents of  $1.0 \times 10^{-6}$  M RAC in PBS with the accumulation potentials in the range of  $-0.2$  to  $+0.3$  V.



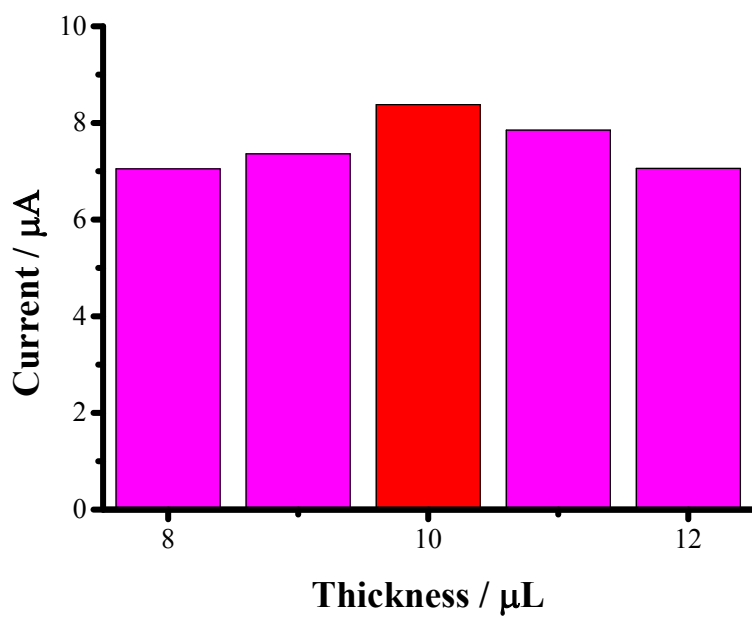

Figure. S8 Peak currents of  $1.0 \times 10^{-6}$  M RAC in PBS with the thickness of the film in the range of 8 to 12  $\mu\text{L}$ .
